# Supplementary material for: Symbiotic Culture of Three Closely Related Dendrobium Species Reveals a Growth Bottleneck and Differences in Mycorrhizal Specificity at Early Developmental Stages
Source: MDPI journal article supplement (doi:10.3390/d14121119), 2022-12-15

**Supplementary Figure S1.** Effects of fungal isolates on the seedling growth of *Dendrobium officinale* (Dof), *D. okinawense* (Dok), and *D. moniliforme* (Dmo) at 3 months after symbiotic culture. Longest root (a), leaf number (b), and tiller number (c). Host orchid is indicated after the fungal isolate name. Bars show standard errors (n = 20 plants per treatment). Mean values with different letters are significantly different at  $P < 0.05$  (Tukey-Kramer test).

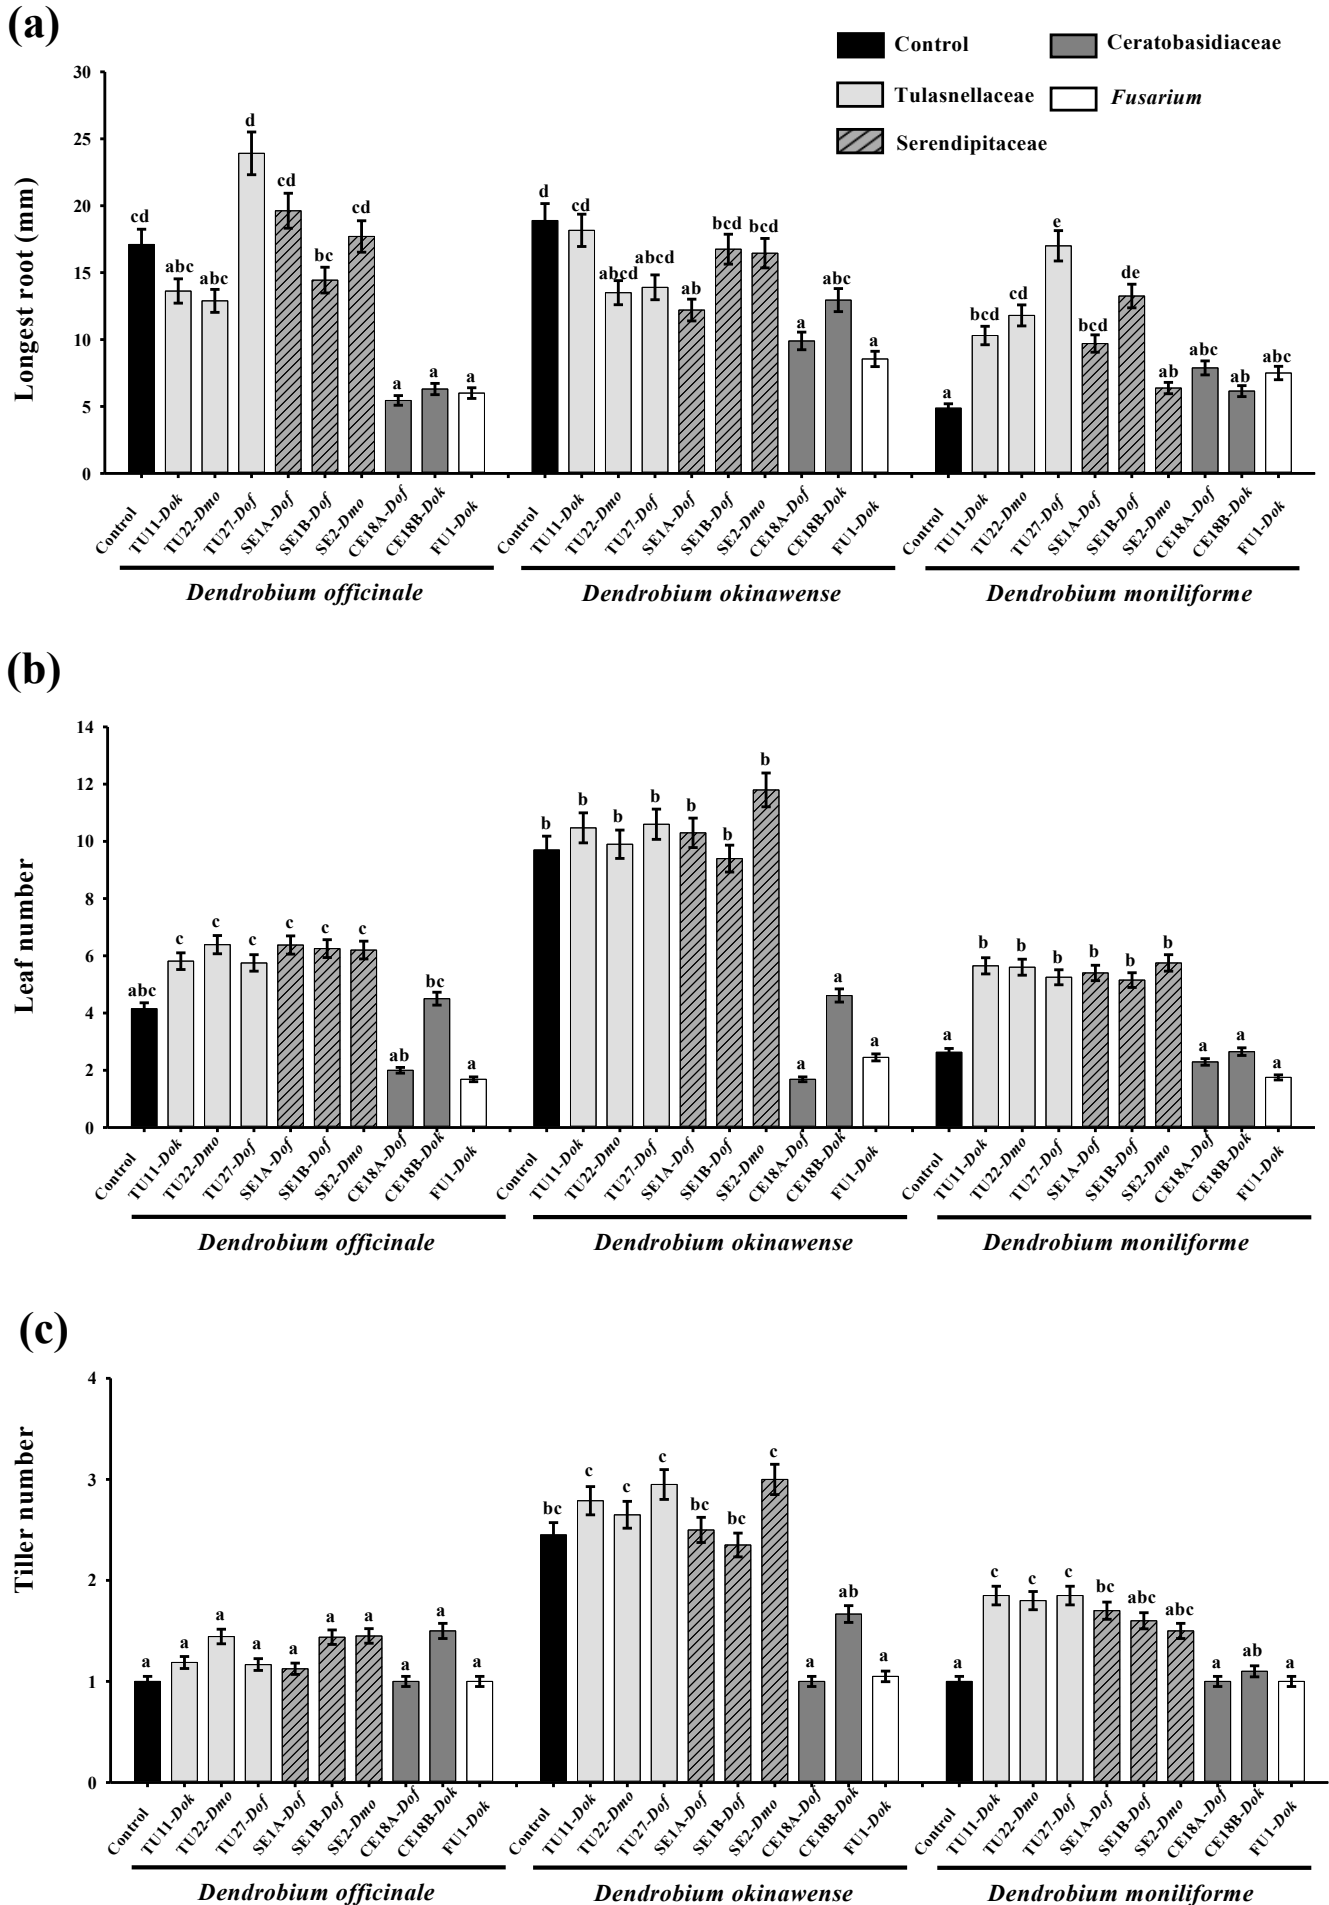

Supplement: s1 [file s1]
